# Supplementary material for: Integrated transcriptomic analysis and machine learning for characterizing diagnostic biomarkers and immune cell infiltration in fetal growth restriction
Source: Front Immunol. 2024 Sep 4;15:1381795. doi: 10.3389/fimmu.2024.1381795 (PMC11408188; doi:10.3389/fimmu.2024.1381795)
Supplement: Supplementary Table 1 — Information on microarray datasets obtained from GEO. GEO, Gene Expression Omnibus. [file Table1.xlsx]

## Sheet: Sheet1
GEO dataset	Platform	FGR	Normal
GSE147776	GPL20844	13	8
GSE203507	GPL16791	21	10
