# Supplementary material for: Integrated transcriptomic analysis and machine learning for characterizing diagnostic biomarkers and immune cell infiltration in fetal growth restriction
Source: Front Immunol. 2024 Sep 4;15:1381795. doi: 10.3389/fimmu.2024.1381795 (PMC11408188; doi:10.3389/fimmu.2024.1381795)
Supplement: Supplementary Table 2 — Detailed clinical characteristics of the FGR and control groups. [file Table2.xlsx]

## Sheet: Validation Samples
Number	Diagnosis	Age at delivery	Conception mode	BMI	Gestational age at birth	Sex of offspring	Birth weight (g)	Birth weight (%)	Umbilical artery pulsatility index (%)	Uterine artery pulsatility index (%)	Uterine artery bilateral notching	Complicated with pre-eclampsia	qRT-PCR	mRNA TREM1/β-actin	Western blot	protein TREM1/β-actin	IHC	TREM1 AOD in IHC
S008	FGR	28	Spontaneous	22.2	37+1	female	2040	0.3th	normal	99.9th	yes	no	√	7.06867
S093	FGR	28	Spontaneous	17.7	37+1	male	2205	1.6th	normal	normal	no	no	√	0.447112
S026	FGR	32	Spontaneous	19.3	38+0	male	2160	0.3th	normal	99.8th	no	no	√	0.868579
S006	FGR	32	Spontaneous	18.5	34+1	male	1560	0.1th	normal	100th	yes	yes	√	4.72896
S019	FGR	36	Spontaneous	21.2	35+5	female	1975	1.8th	98.7th	100th	no	yes	√	0.312794
S111	FGR	26	Spontaneous	21	34+1	female	1650	0.3th	intermittent AEDV	99.7th	no	no	√	0.433797
S159	FGR	34	Spontaneous	22.2	32+3	female	1245	0th	intermittent AEDV	99.7th	yes	no	√	18.9848	√	9.23119	√	1.65979
S160	FGR	33	Spontaneous	20.2	31+4	male	1075	0th	persistent AEDV	normal	no	yes	√	0.869164
S005	FGR	36	Spontaneous	21	23+2	female	380	0.1th	persistent AEDV	100th	yes	yes	√	15.1718	√	3.63708
S032	FGR	30	Spontaneous	22.7	23+5	male	240	0th	persistent AEDV	100th	yes	no	√	0.0725829
S104	FGR	36	Spontaneous	20.7	24+1	male	395	0th	persistent AEDV	100th	yes	no	√	14.9516	√	7.24258	√	1.21649
S115	FGR	33	IVF	26.7	29+2	male	910	0th	persistent REDV	100th	yes	yes	√	15.5386	√	5.15565	√	1.4433
S116	FGR	33	Spontaneous	21.9	29+1	male	735	0th	persistent REDV	100th	yes	yes	√	29.501	√	9.18084
S129	FGR	38	Spontaneous	22.4	27+0	female	650	0.2th	persistent AEDV	100th	yes	yes	√	7.88077
S175	FGR	26	Spontaneous	19.3	25+5	male	315	0th	persistent REDV	100th	yes	no	√	1.21093
S183	FGR	29	Spontaneous	24.4	24+1	male	470	0.3th	persistent AEDV	98.3th	yes	no	√	0.534004
S199	FGR	28	Spontaneous	18.1	21+2	male	245	0th	intermittent AEDV	normal	no	no	√	3.96855
S211	FGR	31	Spontaneous	21.8	26+0	male	275	0th	persistent REDV	100th	yes	no	√	16.2368	√	7.68375
S002	FGR	30	Spontaneous	21.5	27+6	male	850	1th	intermittent AEDV	100th	no	yes	√	0.416012
S010	FGR	38	Spontaneous	21.5	38+0	female	2565	8.1th	normal	normal	no	no	√	4.72773
S011	FGR	35	Spontaneous	21.1	37+3	male	1890	0th	normal	98.7th	no	no	√	13.7279
S022	FGR	32	Spontaneous	22.5	37+4	female	2225	1.3th	normal	normal	no	no	√	1.32131
S033	FGR	26	Spontaneous	19.7	29+6	male	995	0.2th	normal	100th	no	yes	√	14.7574
S034	FGR	34	Spontaneous	21.1	32+0	female	1360	0.6th	normal	100th	yes	yes	√	9.35144
S035	FGR	27	Spontaneous	23.6	37+0	female	2290	3.8th	normal	97.7th	no	no	√	33.4404	√	4.83813
S049	FGR	35	Spontaneous	24	37+2	female	2500	9.5th	normal	normal	no	no	√	15.0132
S050	FGR	42	Spontaneous	22.6	34+4	male	1985	8.3th	normal	99.9th	no	yes	√	7.12093
S059	FGR	27	Spontaneous	22.9	34+2	male	1590	0.1th	normal	100th	no	no	√	14.5263	√	1.48379
S060	FGR	37	Spontaneous	21.7	37+1	female	2145	0.9th	normal	100th	no	no	√	24.3886	√	3.76248
S067	FGR	29	ICSI	35	31+0	female	1085	0th	98.2th	100th	no	yes	√	10.6115	√	2.82217
S068	FGR	25	Spontaneous	15.2	37+3	female	2085	0.3th	normal	100th	yes	no	√	18.0707	√	3.29525
S074	FGR	28	Spontaneous	20	37+4	male	2295	2.0th	normal	normal	no	no	√	5.53623
S075	FGR	28	Spontaneous	19.6	34+6	male	2010	6.9th	normal	100th	no	no	√	28.5418	√	4.90723
S077	FGR	30	PGT	20.8	37+1	male	2305	3.6th	normal	normal	no	no	√	7.96708
S079	FGR	34	Spontaneous	21.1	35+3	female	1235	0th	normal	100th	yes	no	√	4.94139
S082	FGR	30	Spontaneous	20.2	37+1	male	2190	1.4th	normal	normal	no	no	√	3.74907
S086	FGR	31	Spontaneous	25.3	26+4	female	420	0th	normal	normal	no	no	√	1.20637
S091	FGR	30	Spontaneous	19.6	23+3	male	240	0th	persistent REDV	100th	yes	no	√	3.32947
S099	FGR	26	IVF	18.4	37+4	female	2430	5.5th	normal	normal	no	no	√	2.77604
S102	FGR	39	Spontaneous	20.7	36+5	male	1930	0.2th	normal	99.5th	no	no	√	7.97415
S107	FGR	36	Spontaneous	20.4	27+2	male	950	4.2th	persistent REDV	97th	yes	no	√	7.04411	√	1.83266
S110	FGR	24	Spontaneous	21	38+3	female	2125	0.1th	normal	normal	no	no	√	8.38398	√	2.31627	√	0.969072
S113	FGR	30	Spontaneous	19.5	36+0	male	1880	0.3th	normal	96.9th	no	no	√	22.7816	√	5.08487
S125	FGR	28	Spontaneous	18.3	32+5	male	820	0th	intermittent AEDV	100th	yes	no	√	15.5648	√	4.01397
S134	FGR	26	Spontaneous	23.1	21+0	male	226	0th	persistent REDV	99.9th	yes	no	√	32.8197	√	4.54781
S140	FGR	32	Spontaneous	19.8	29+2	male	995	0.5th	intermittent AEDV	normal	no	no	√	24.4639
S147	FGR	30	Spontaneous	22.9	28+2	female	635	0th	persistent AEDV	100th	yes	no	√	28.0002	√	6.36107
S164	FGR	27	Spontaneous	19.8	37+2	female	2075	0.5th	normal	normal	no	no	√	3.77456
S168	FGR	40	Spontaneous	18	34+1	female	1445	0th	99.3th	normal	no	yes	√	98.9003	√	4.87512
S170	FGR	37	Spontaneous	21.6	34+1	female	1575	0.1th	normal	100th	yes	yes	√	13.2678
S171	FGR	28	Spontaneous	24.3	27+4	male	795	0.5th	normal	99.6th	yes	yes	√	8.72093
S172	FGR	36	Spontaneous	22.3	31+0	male	845	0th	99.8th	100th	yes	yes	√	106.449	√	3.0745
S186	FGR	31	Spontaneous	21.5	24+4	male	300	0th	persistent REDV	99.7th	yes	no	√	9.34468	√	5.87809
S191	FGR	31	Spontaneous	26.2	24+0	male	400	0th	intermittent AEDV	98.8th	yes	no	√	4.08472
S193	FGR	33	Spontaneous	20.2	37+5	male	2080	0.2th	normal	100th	yes	no	√	63.1819	√	4.92958
S208	FGR	37	Spontaneous	27.1	27+6	male	755	0th	persistent REDV	100th	yes	yes	√	6.03758
S221	FGR	33	PGT	21.8	33+6	female	1650	0.8th	intermittent AEDV	99.2th	yes	no	√	8.4836
S230	FGR	27	Spontaneous	23	27+2	male	650	0th	persistent REDV	100th	no	yes	√	54.8669	√	5.31597	√	1.04124
S231	FGR	34	Spontaneous	18	27+5	male	700	0th	normal	99.8th	yes	no	√	3.00231
S235	FGR	34	ICSI	20.8	37+1	female	2150	1th	normal	normal	no	no	√	2.65032
S236	FGR	32	Spontaneous	21.9	22+0	male	335	0.4th	intermittent REDV	99.9th	yes	yes	√	99.4465	√	11.5838	√	1.34021
S237	FGR	23	Spontaneous	23.9	23+6	female	370	0th	intermittent AEDV	100th	yes	no	√	1.03852
J035	control	30	Spontaneous	21.8	38+4	male	3980	95.3th	normal	/	/	no	√	0.920966	√	1.33611
J036	control	38	Spontaneous	26.8	38+4	male	3140	45.6th	normal	/	/	no	√	0.942368	√	2.67134
J038	control	25	Spontaneous	29	22+0	female	600	98.9th	normal	/	/	no	√	1.53523	√	0.359155
J044	control	34	Spontaneous	20.3	19+6	male	280	18th	normal	/	/	no	√	0.953217	√	0.615296
S078	control	30	Spontaneous	17.3	32+5	male	2150	77.0th	normal	/	/	no	√	0.44255	√	0.237322
S106	control	32	Spontaneous	20.7	33+2	female	2380	86.7th	normal	/	/	no	√	1.04992	√	0.877824	√	1.21649
S080	control	29	Spontaneous	22.7	34+0	female	2410	74.2th	normal	/	/	no	√	0.38851	√	1.05458
S027	control	31	Spontaneous	22.8	34+0	male	2530	85.4th	normal	/	/	no	√	0.243414	√	0.61494
S012	control	34	Spontaneous	21.8	35+2	female	2400	37.3th	normal	/	/	no	√	0.767817	√	1.47307
S066	control	35	Spontaneous	20.7	37+0	male	3295	86.2th	normal	/	/	no	√	0.563159	√	1.1369
S081	control	37	Spontaneous	19.2	37+4	female	2710	22.5th	normal	/	/	no	√	0.438167	√	1.7336
S180	control	35	IVF	26.5	28+5	female	1280	58.6th	normal	/	/	no	√	0.287519	√	0.425576
J054	control	30	Spontaneous	20.8	24+0	female	635	50.5th	normal	/	/	no	√	0.495517	√	0.165492
J057	control	31	Spontaneous	25.8	24+1	male	710	77.9th	normal	/	/	no	√	0.27807	√	0.212499
S167	control	31	Spontaneous	18.8	31+2	male	2000	92th	normal	/	/	no	√	4.28839	√	0.359588	√	0.907216
J103	control	24	Spontaneous	26.7	22+1	female	500	70.2th	normal	/	/	no	√	0.422461	√	1.21363	√	0.989691
J114	control	41	Spontaneous	22.9	22+5	female	600	89.8th	normal	/	/	no	√	0.254251	√	0.456535	√	0.927835
S088	control	29	Spontaneous	20.6	36+5	female	3215	85.8th	normal	/	/	no	√	1.46118	√	0.604583	√	0.969072
S162	control	31	Spontaneous	21.6	37+2	male	3280	81.8th	normal	/	/	no	√	2.17771	√	2.60046	√	0.989691
S038	control	31	Spontaneous	19.5	37+3	female	3160	69.3th	normal	/	/	no	√	3.09855	√	2.4913
S176	control	35	ICSI	21.1	34+2	male	2455	71.9th	normal	/	/	no	√	0.366279	√	1.84862
J075	control	38	Spontaneous	22	25+5	female	850	88.3th	normal	/	/	no	√	0.175578	√	0.409859
J088	control	32	Spontaneous	18.8	21+2	female	350	10.4th	normal	/	/	no	√	0.520631	√	0.468953
J097	control	25	Spontaneous	20	23+3	female	510	30.7th	normal	/	/	no	√	1.92855	√	0.632773
