# Supplementary material for: Integrated transcriptomic analysis and machine learning for characterizing diagnostic biomarkers and immune cell infiltration in fetal growth restriction
Source: Front Immunol. 2024 Sep 4;15:1381795. doi: 10.3389/fimmu.2024.1381795 (PMC11408188; doi:10.3389/fimmu.2024.1381795)
Supplement: Supplementary Table 3 — Details of DEGs. DEGs, differentially expressed genes. [file Table3.xls]

id	logFC	AveExpr	t	P.Value	adj.P.Val	B
TMEM136	1.159536616	8.486987636	6.727074782	1.30130515484438e-08	4.28687098153021e-05	9.486207634
SLC45A4	1.156292052	9.134307281	6.412030715	4.14841444636414e-08	8.69658519392337e-05	8.416133249
TRIM62	1.239938483	7.138732551	6.349721471	5.21520572716617e-08	9.25097262065014e-05	8.20475305
ASMTL-AS1	1.30126748	6.791317595	6.302138324	6.21032457306793e-08	9.54733897699643e-05	8.043422801
AFF1	1.055610341	12.28835883	5.901956905	2.68162301626624e-07	0.000294468	6.691341551
MARCO	-2.875662192	5.602964825	-5.804565844	3.82052467945515e-07	0.000343009	6.364043674
CD99P1	1.085429789	7.476239859	5.80328257	3.83836081394647e-07	0.000343009	6.359736807
SLC25A25-AS1	1.453168158	4.792540427	5.801205185	3.86740950211882e-07	0.000343009	6.352765113
SCD	-1.283210938	8.188864319	-5.738008662	4.86333755608279e-07	0.00036177	6.140879649
DGKK	2.509160487	1.659771405	5.604737164	7.87308425416303e-07	0.000465521	5.695432814
SLC9A1	1.052030075	9.389375822	5.36684091	1.84964991854237e-06	0.000748297	4.90576756
LOC729218	1.72027046	5.006294691	5.306118682	2.29715406564688e-06	0.000842644	4.705504204
FBXL19-AS1	1.272425674	7.176166567	5.248168461	2.82327087122855e-06	0.000986434	4.514930051
AFF3	1.223549144	6.562553644	5.229562863	3.01616866899978e-06	0.001038102	4.453861842
BIN2	-1.113788017	8.688612057	-5.21597738	3.1651754352863e-06	0.001073367	4.409308011
HEXB	-1.119911081	13.17558287	-5.209948562	3.23360385979303e-06	0.00108068	4.38954654
SERPINA3	-4.175768834	6.722430875	-5.160391615	3.85422570693424e-06	0.001217513	4.227347848
ADAMTS3	1.025753208	6.807503898	5.118309598	4.47234092585456e-06	0.001331127	4.08996058
ANP32A-IT1	1.701468186	7.03383895	5.054843271	5.59352744243133e-06	0.001465758	3.883385444
NAV2-AS4	1.985165876	5.598152955	5.045663901	5.77709061485352e-06	0.001467352	3.853571967
LOC101926935	1.69175409	3.163503086	5.043761108	5.81587677854725e-06	0.001467352	3.847393998
SGK494	1.049728623	6.459499413	5.023940107	6.23545471258081e-06	0.001546125	3.783081985
PILRB	1.675952041	5.939357045	4.996500896	6.86582323001629e-06	0.001649228	3.694181562
LOC100507487	1.07443788	7.197754127	4.981625796	7.2333334872742e-06	0.001719595	3.646051711
LRRC7	2.298694998	2.099954259	4.871855965	1.06128163569057e-05	0.002308788	3.292325827
FHDC1	1.004874805	9.868278296	4.839149772	1.18909998106315e-05	0.002466265	3.187443402
LOC90246	1.050281433	7.28282641	4.837041463	1.1978390021847e-05	0.002466265	3.18069079
NPIPB5	1.70196829	6.685557195	4.829128079	1.23120611124142e-05	0.002468516	3.155354435
CLDN16	2.005882574	4.529792882	4.826670939	1.24175108254403e-05	0.002468516	3.147490316
SPINK1	-2.416199573	2.47717721	-4.818551682	1.27722948199675e-05	0.002469361	3.121514396
SLC25A35	1.666845199	7.667693976	4.816800646	1.28501029140148e-05	0.002469361	3.11591431
CRIPAK	1.079759031	7.478917448	4.794594401	1.3878116477932e-05	0.002537337	3.044957291
RNASE4	-1.541961476	6.027207135	-4.745606249	1.64395382695766e-05	0.002772664	2.888835583
ACOXL	2.018066466	7.440890483	4.733784479	1.71239500393372e-05	0.002840851	2.851247226
DIO2	-2.382489812	8.502104881	-4.714784506	1.82828523622389e-05	0.002940719	2.790907082
MUC4	2.549476908	5.627222288	4.676318889	2.0869122510999e-05	0.003251635	2.66902362
LINC00885	1.276537985	6.522046795	4.674096944	2.10289947999924e-05	0.003254486	2.661994511
CBR3-AS1	1.07921867	6.836666254	4.664489037	2.17342091172201e-05	0.003254486	2.631614477
QPCT	-1.492235018	7.140307636	-4.655141188	2.24425300003485e-05	0.003296336	2.60207948
ANKRD20A5P	1.628197375	6.442863859	4.647846332	2.30109358923869e-05	0.003337309	2.57904668
LOC100129345	1.956227854	6.789350801	4.636721375	2.39050010148848e-05	0.003416473	2.543947303
TMEM74B	1.208557118	8.361186303	4.628152399	2.46167394748418e-05	0.003419651	2.516934105
TMEM45A	-1.442675461	9.183829153	-4.614712024	2.57750484683037e-05	0.003516998	2.474602988
SOD2	-1.069081807	9.800700005	-4.602751106	2.68505633760835e-05	0.0036422	2.436971717
FSTL3	-1.937280657	12.59286502	-4.552133932	3.19085079278919e-05	0.003893176	2.278146719
PCDH11X	1.173870815	6.254599432	4.530377068	3.43584152068445e-05	0.004148008	2.210094216
MC1R	1.099207371	10.02693529	4.524880765	3.50058263237492e-05	0.004161002	2.192923356
CYP4F35P	1.873771935	2.837206902	4.521573453	3.54011204009492e-05	0.004186409	2.182595143
LINC00284	2.000022053	5.994242483	4.504714986	3.74847808907937e-05	0.004343714	2.129996627
DLX4	1.126624656	7.226809483	4.495082192	3.87286233907053e-05	0.004373577	2.099978358
CECR2	1.293952687	8.304165265	4.468919039	4.23137626288436e-05	0.004646454	2.018581145
SLC1A6	-2.845111601	3.54591691	-4.466092595	4.27199238738349e-05	0.004646598	2.009799488
SH3TC2	1.313380869	10.55072435	4.447990336	4.54128756169362e-05	0.00481499	1.953611557
BEST4	1.752776946	4.481828378	4.423515362	4.93184888698793e-05	0.004988089	1.877796162
ADORA3	-2.124654208	4.205120872	-4.410020263	5.16100770409711e-05	0.005174471	1.836068821
KHDRBS3	-1.538809394	4.838268341	-4.368789955	5.92728615940709e-05	0.005703153	1.708923137
CD52	-1.960467062	5.898460568	-4.36837014	5.93563180856472e-05	0.005703153	1.707631176
APOC1	-1.359540281	7.626942826	-4.35987916	6.10690387960347e-05	0.005778201	1.681512242
CYTIP	-1.727300997	5.663463246	-4.343494501	6.45110460653552e-05	0.005974396	1.63117468
EP400NL	1.110993026	6.032857553	4.339707239	6.53331272289171e-05	0.006026328	1.619551178
UBD	-3.220686544	3.653078555	-4.31325308	7.13665287468433e-05	0.00635939	1.538485951
TREM2	-1.630876452	5.257937852	-4.31300361	7.14259281362795e-05	0.00635939	1.537722534
SPX	2.399523407	4.26890129	4.306447104	7.30044050015107e-05	0.006425502	1.517665663
C12orf75	-1.402907738	8.138448571	-4.301810719	7.41410389135024e-05	0.006500731	1.503490844
LINC00265	1.104657008	6.701069105	4.288133531	7.75952575206435e-05	0.006643725	1.461715561
RAVER1	1.127127114	8.771454397	4.287385484	7.77886257113643e-05	0.006643725	1.459432473
TREM1	1.70985271	7.701964936	-4.285348243	7.83176256464582e-05	0.006664223	1.453215591
ANKRD22	-2.399824688	2.730624627	-4.281658743	7.92845753557806e-05	0.006689767	1.441960049
LINC00174	1.194054421	5.658524425	4.270338227	8.23244665926046e-05	0.006784321	1.407452013
ESRRG	1.086897547	8.546250775	4.255597051	8.64531322658379e-05	0.007044556	1.362579218
ARTN	1.448968214	5.60630623	4.247617223	8.8771321618473e-05	0.00718269	1.338317873
RARRES1	-1.71211872	5.96289489	-4.223445004	9.61680249760023e-05	0.007620738	1.264954259
EPSTI1	-1.051431907	7.751114397	-4.217321012	9.81349814706554e-05	0.007741095	1.24639848
SND1-IT1	1.083630781	5.890975171	4.216633483	9.83582315195242e-05	0.007741095	1.244316039
RAB3B	1.415505142	9.573652115	4.215386709	9.87643347760059e-05	0.007746618	1.240540115
HTRA4	-1.838356738	11.82292761	-4.212048841	9.98595843810387e-05	0.007779601	1.23043376
IL1R2	-2.786698272	6.860554394	-4.190813702	0.000107109	0.008007433	1.166225906
NAV2-AS5	1.572901856	1.191139472	4.190277257	0.000107298	0.008007433	1.16460585
IL23A	-1.368549538	1.625308127	-4.146195199	0.000124041	0.008855706	1.031814393
LINC01206	1.279816379	1.485578441	4.125297612	0.000132838	0.009226656	0.969097668
KAZN	1.008599835	7.287288826	4.099356607	0.000144602	0.009561899	0.891458139
CCL18	-2.639524925	3.798427988	-4.08911556	0.000149518	0.009739804	0.86087311
LOC100129917	1.273035617	7.82968622	4.087078726	0.000150515	0.009764476	0.854794541
EHMT1-IT1	1.331426656	3.194930343	4.086613429	0.000150744	0.009764476	0.853406151
AQP9	-1.236494725	6.212474749	-4.084460659	0.000151806	0.009793089	0.84698356
SCART1	1.774316472	5.020438895	4.083998841	0.000152035	0.009793089	0.845605986
TAP1	-1.128899445	10.11970009	-4.075985516	0.000156059	0.009941215	0.82171491
LOC100507175	1.317485425	1.115783498	4.069198984	0.000159547	0.010059343	0.80149948
HSD17B1	1.300545371	12.92417061	4.06647835	0.000160967	0.010059343	0.793400037
LINC00954	1.511732305	3.297907618	4.064401538	0.000162059	0.010100204	0.787219084
CP	-2.226223149	5.990071607	-4.0598175	0.000164494	0.010224355	0.773581713
HAMP	-2.052797161	3.40900681	-4.038427262	0.000176334	0.010589964	0.710047489
HN1	-1.29021919	10.5384905	-4.031157939	0.000180543	0.010675157	0.68849394
CXCL10	-2.451351703	6.221851536	-4.028259677	0.000182247	0.010713088	0.679906008
KRTAP11-1	1.472322429	1.24263167	4.027700888	0.000182578	0.010713088	0.678250599
TXK	1.091817635	7.928073934	4.024233322	0.000184641	0.010779324	0.667980533
LINC00501	2.102785408	1.273263706	4.021512274	0.000186277	0.010796617	0.659924575
LOC255187	1.426691408	6.312082588	4.018626328	0.000188026	0.010816591	0.651383413
LOC101926892	1.215587164	6.538669542	4.016471112	0.000189343	0.01086133	0.64500691
PRG2	-2.46016066	14.21411431	-4.011410444	0.000192471	0.011013333	0.630041004
SIGLEC10	-1.910671335	3.731200618	-3.992738745	0.000204447	0.011470929	0.574905781
CHI3L2	-2.215786998	6.07805157	-3.984025678	0.000210279	0.011600579	0.549221872
COL17A1	-1.883237113	10.30734662	-3.967375332	0.000221875	0.012051673	0.500220579
VANGL2	1.537646642	5.322698677	3.952176078	0.000232996	0.012481966	0.455581768
KDELR3	-1.096092998	7.577957775	-3.941662597	0.000241002	0.012805317	0.424756363
PCDHB13	1.772372798	6.815417992	3.93936619	0.000242786	0.01281153	0.418028979
EXPH5	1.170560426	12.58490851	3.934120834	0.000246908	0.012969688	0.402670199
EGFR-AS1	-2.581869997	6.663784644	-3.929660998	0.000250466	0.013026439	0.389619838
HK3	-1.299039831	4.926207925	-3.91606324	0.000261621	0.013376888	0.349877724
GDPD5	1.000246078	9.699650967	3.912317087	0.000264777	0.013471091	0.338941502
ZNF554	1.281707953	7.099986253	3.911800143	0.000265216	0.013471091	0.337432805
SLC22A14	1.719407523	2.2658282	3.905068505	0.000270989	0.013734104	0.317796134
HLA-DQB2	-1.945054765	3.511846354	-3.899264583	0.000276065	0.013835418	0.300879932
ZNF703	1.024360382	9.161105935	3.896016479	0.000278945	0.013862456	0.29141873
ADAMTS6	1.202787086	9.825776197	3.895356425	0.000279533	0.013862456	0.289496608
LAIR2	-2.620446474	6.036508993	-3.894281638	0.000280495	0.01388028	0.28636712
LOC101929633	1.203493296	4.839716823	3.889580954	0.000284737	0.01397726	0.272685359
LOC729737	1.527378889	4.444695672	3.87093511	0.00030218	0.014427074	0.218501102
LOC100129434	1.401231526	5.367832621	3.862600325	0.000310306	0.014520796	0.194325194
GCH1	-1.003541546	6.321206377	-3.84207837	0.000331221	0.014976386	0.134917808
CAPG	-1.36973871	8.525267188	-3.835645471	0.000338052	0.015225537	0.116330658
HEATR4	1.743208982	4.211515084	3.819766904	0.000355498	0.01588716	0.070523184
CCM2L	1.312676314	8.602486496	3.790249125	0.000390256	0.016915995	-0.014357431
LINC00969	1.084927003	7.085075612	3.773095574	0.000411932	0.01742965	-0.063518389
XDH	1.363021467	6.882101992	3.762922927	0.000425328	0.017770688	-0.092614598
RARRES3	-1.015243653	8.1371823	-3.750963482	0.000441613	0.018316264	-0.12676598
ADARB2	1.783450977	3.337604494	3.745522598	0.000449218	0.018398476	-0.142283029
GALNT3	-1.18231956	6.514757703	-3.74546395	0.0004493	0.018398476	-0.142450223
ASMT	1.668900671	3.565277673	3.74435577	0.000450865	0.018401674	-0.14560912
PROSER3	1.026061624	5.591074221	3.743500833	0.000452076	0.018401829	-0.148045786
LOC100289650	1.647642053	4.614777971	3.740834499	0.000455871	0.01844279	-0.155643153
MXRA5	1.475127664	7.306429318	3.727814248	0.00047485	0.018821295	-0.19269931
CLDN1	1.150713389	8.95828131	3.720048513	0.000486528	0.019178335	-0.214766545
CCK	2.370334025	7.835979524	3.716806265	0.000491484	0.019236795	-0.223972145
PCDHGC4	1.747949502	3.443405222	3.715810744	0.000493016	0.019236795	-0.226797787
P2RY4	1.263938184	1.523073625	3.713813056	0.000496103	0.019307607	-0.232466658
PCDHGC5	1.528996206	2.900896563	3.702239415	0.000514358	0.019540502	-0.265275635
PTPN22	-1.893932365	3.467071735	-3.696429791	0.000523762	0.019832422	-0.281723019
GUCY2GP	1.858767657	3.466408786	3.69552496	0.000525241	0.019855837	-0.284283337
LCMT1-AS1	1.437530731	1.954254098	3.684311527	0.000543911	0.02028475	-0.315983538
CKMT2	-1.759148757	2.311939623	-3.683923773	0.000544568	0.02028475	-0.317078736
PKD1	1.08544369	9.241746664	3.682925029	0.000546263	0.02028475	-0.319899355
IL27RA	-1.229330488	6.01579976	-3.665411838	0.000576826	0.021113649	-0.369288855
HIST1H1T	1.493302812	3.376315117	3.664118714	0.000579146	0.0211315	-0.37293032
CXCL8	-1.354394947	3.650684032	-3.657273541	0.000591579	0.021449385	-0.392194238
ENKUR	-1.983242087	3.149940348	-3.647701688	0.000609393	0.021854759	-0.419097099
LINC01119	1.461360365	7.047545881	3.6349449	0.000633935	0.022352503	-0.454888658
SPIRE2	1.01091233	10.55306805	3.628993119	0.000645706	0.02262914	-0.471562786
CCRL2	-1.188062833	5.879540153	-3.616018174	0.000672095	0.023201374	-0.507857808
ACE2	-1.04021689	6.146645276	-3.605586657	0.000694057	0.023610954	-0.536983382
EXOSC5	-1.12122585	5.038491367	-3.595126379	0.000716766	0.024129384	-0.566140079
SCARF2	1.232861161	7.139952298	3.592406577	0.000722786	0.024187766	-0.573713088
NFIC	1.07280384	7.393149101	3.590787526	0.000726393	0.024187766	-0.578219578
RGS1	-1.724436846	6.650554822	-3.586991152	0.000734917	0.024384443	-0.588781803
F2RL1	-1.049159964	6.313602553	-3.582990336	0.000744004	0.02450961	-0.599905747
ANK3	1.049367396	12.03581712	3.582318781	0.00074554	0.024525166	-0.601772239
CATSPERB	1.513168096	5.662347774	3.581509615	0.000747394	0.024551146	-0.604020928
SFRP1	-1.148755944	9.062487074	-3.576782361	0.000758316	0.024792076	-0.61715211
MUC20	1.346154314	6.496152695	3.574746659	0.000763066	0.024811549	-0.622803668
CA10	1.793025476	6.14043413	3.573609457	0.000765732	0.024813038	-0.625959967
KCNQ4	1.256266931	2.298215624	3.566024801	0.000783742	0.025044948	-0.646996044
CD300A	-1.063545527	6.059942359	-3.556719142	0.000806391	0.025473128	-0.672769335
LOC729739	-2.254858973	5.55496493	-3.547166577	0.00083029	0.026006899	-0.699185054
SLAMF8	-1.381761891	6.635253201	-3.539451813	0.000850083	0.026383472	-0.720487958
LINC01095	1.914065713	3.814321733	3.535016718	0.000861665	0.02660436	-0.732722183
LOC401585	1.216019754	4.634500252	3.528232947	0.000879671	0.027098788	-0.751417574
FPR3	-1.591473811	6.97497803	-3.528042478	0.000880182	0.027098788	-0.75194218
VN1R1	1.016913011	4.666830991	3.526329987	0.000884786	0.027124123	-0.756658097
DHRS2	1.060791285	7.935363414	3.525377137	0.000887358	0.027124123	-0.759281495
NTRK2	-1.704777386	6.586161217	-3.520709857	0.000900059	0.027354202	-0.772125405
HCN2	1.749040896	4.499938337	3.520534549	0.00090054	0.027354202	-0.772607637
FLJ45513	1.275362819	4.330809339	3.514390109	0.000917534	0.027657939	-0.78950053
HLA-DRB1	-1.182063308	9.886157019	-3.512592032	0.000922564	0.027773274	-0.794440638
EGLN3	-1.912098727	7.710643923	-3.510713005	0.000927849	0.027846153	-0.799601531
LCMT1-AS2	1.131200463	12.85044726	3.506565865	0.000939616	0.02803046	-0.81098611
SNORD37	1.329628488	1.687672383	3.505493872	0.000942681	0.028085551	-0.813927595
HIST1H2BB	-1.337313764	6.845215935	-3.503278781	0.000949043	0.028202246	-0.820003959
LOC731424	-1.478377255	1.960437307	-3.501585975	0.000953934	0.028299926	-0.824646052
ERV3-1	1.08867103	10.1346149	3.499523134	0.000959925	0.028350348	-0.830301047
STAR	-2.116513118	2.246887642	-3.499437561	0.000960174	0.028350348	-0.83053559
CYP26A1	-2.177359453	5.304078775	-3.495484445	0.000971759	0.028546205	-0.841366757
GBP5	-1.634225434	7.002991158	-3.494048597	0.000976	0.028565857	-0.845299017
POMC	-1.664801263	5.468182907	-3.49402597	0.000976067	0.028565857	-0.845360977
LOC100129935	1.320211159	8.836205209	3.484230231	0.001005474	0.029055435	-0.872161809
KCNC4	1.088969079	5.662577128	3.483307675	0.001008287	0.02906387	-0.874683551
ADAMTSL1	1.387043995	4.675767899	3.479854593	0.001018881	0.029193656	-0.884118723
CATSPER1	-1.526357634	2.500151275	-3.479367011	0.001020385	0.029193656	-0.885450533
ANG	-1.469592428	5.288137292	-3.473941927	0.001037268	0.029566613	-0.900261284
KCNAB2	-1.051054926	5.026212308	-3.470575888	0.001047876	0.02977793	-0.909443694
FGG	-3.296535448	3.838028855	-3.469140939	0.001052429	0.02977793	-0.913356531
PYCR1	-1.278708047	8.460938102	-3.468509268	0.001054439	0.029798252	-0.915078668
FABP7	-1.977673721	1.762969179	-3.466133703	0.001062033	0.029939463	-0.921553512
MUSK	1.396748175	3.09432205	3.462748701	0.001072943	0.030136504	-0.930775018
ZC3HAV1L	1.120068413	6.96299868	3.45870609	0.001086113	0.030358494	-0.941780818
DNM1	1.137963702	8.444567092	3.45652762	0.001093273	0.03052164	-0.947708342
ASCL2	-2.030600081	8.409719163	-3.451884028	0.001108686	0.030708681	-0.960335753
MT1F	-1.496550039	4.041784021	-3.450906176	0.001111958	0.030708681	-0.962993525
MUC15	1.267736688	10.09669115	3.448935304	0.00111858	0.030854621	-0.968348898
MCEMP1	-1.793342535	2.642297248	-3.447513186	0.001123382	0.030905776	-0.972212002
OR2Z1	1.154615722	0.790958723	3.435325417	0.001165346	0.031360082	-1.005279398
ERVV-2	1.175878337	7.470555137	3.434904069	0.001166824	0.031360082	-1.006421299
C5orf46	-1.767996354	2.175148261	-3.43027283	0.001183177	0.031578762	-1.018966826
TENM4	-1.255669142	3.466170027	-3.42138683	0.001215165	0.032073555	-1.043008891
ASIC3	1.497184109	3.514724518	3.420863426	0.001217074	0.032073555	-1.044423821
TSSK3	1.16509004	0.929737917	3.420432762	0.001218648	0.032073555	-1.045587946
EPHB6	1.078233991	7.502478502	3.416306282	0.001233822	0.032221885	-1.056737619
C10orf107	-1.745027619	2.580336398	-3.411408709	0.001252064	0.03258757	-1.069959987
ZNF467	1.434875087	7.384788192	3.410828332	0.001254242	0.032607471	-1.071526101
HCAR3	-1.676153186	5.010416942	-3.40154105	0.001289599	0.033243584	-1.096564862
VMO1	-1.506157474	3.559312245	-3.401000645	0.001291685	0.033243584	-1.098020507
SLC15A1	1.449513343	5.083983211	3.400482127	0.001293689	0.03325806	-1.09941706
SLAMF7	-2.182404669	4.802038997	-3.398412222	0.001301722	0.033343636	-1.10499074
PADI1	-2.240422421	5.670389498	-3.397583909	0.001304949	0.033361558	-1.107220566
VTCN1	-1.641784575	4.022300065	-3.397200443	0.001306446	0.033362834	-1.108252746
C9orf153	1.369941607	4.601042129	3.381149702	0.001370575	0.034541497	-1.151391734
HK2	-1.249477385	8.17919926	-3.379568845	0.001377051	0.034553634	-1.155633662
ZFP42	-1.786210024	2.378898382	-3.375422183	0.001394174	0.03490733	-1.166754554
SYNPO2L	1.299360842	5.30097667	3.372229338	0.001407496	0.035026236	-1.175311602
C1QTNF1-AS1	1.036719137	6.580970861	3.371906374	0.00140885	0.035026236	-1.176176885
TAS2R60	1.472996249	3.08511879	3.3640989	0.001441967	0.03556337	-1.197078862
DDIT4L	-1.410615421	5.459676659	-3.363679933	0.001443764	0.035569667	-1.198199653
LINC01061	1.36481236	2.677707644	3.356944723	0.001472959	0.036060885	-1.216205177
LOC101929563	1.138710328	1.167967375	3.350835511	0.001499923	0.036524	-1.232517586
OR51B2	1.181678502	0.967573855	3.340837422	0.001545063	0.037152407	-1.259173451
FOXP4	1.309924029	8.048708129	3.340389588	0.001547115	0.037159655	-1.260366245
PLAC4	1.067559529	14.94420785	3.340068513	0.001548588	0.037159655	-1.261221356
OR51B5	1.451036998	3.19593593	3.337874183	0.001558687	0.037322934	-1.267064077
THSD7B	1.39832852	1.616778888	3.33610877	0.001566858	0.037322934	-1.271762987
TGM3	1.32144579	1.25309952	3.335278562	0.001570714	0.037322934	-1.273972165
FAM26F	-1.3057133	6.863232901	-3.333120641	0.00158078	0.037322934	-1.279712754
TIMD4	-1.607396237	5.771986751	-3.332814273	0.001582214	0.037322934	-1.280527577
CRTAM	-1.634150993	2.021492844	-3.332470628	0.001583824	0.037322934	-1.281441484
CHST6	1.428721192	6.252672388	3.331904027	0.001586482	0.037322934	-1.282948204
CLEC10A	-1.649198083	3.592041863	-3.32812455	0.00160432	0.037432137	-1.292994538
SLC25A2	1.229393444	3.641614755	3.328079835	0.001604532	0.037432137	-1.293113352
CD38	-1.968586364	3.052583494	-3.322540397	0.001631023	0.037857977	-1.307824704
NDUFAF2	-1.026963467	5.976786699	-3.322365564	0.001631866	0.037857977	-1.308288766
PDZK1IP1	-2.394269769	3.879248446	-3.321636948	0.001635383	0.037901433	-1.310222565
CSF3	-1.383842052	1.549805661	-3.318396049	0.001651113	0.038095029	-1.318820885
HAPLN3	-1.293406164	6.874310023	-3.318157015	0.001652278	0.038095029	-1.319454847
TNFAIP6	-1.453563942	3.038484846	-3.317876405	0.001653648	0.038095029	-1.320199038
TAC3	-2.604008188	10.53295838	-3.314202792	0.001671677	0.038318967	-1.329937959
IL4I1	-1.502026445	6.617418962	-3.307115544	0.001706987	0.038819646	-1.348707189
PRPS1L1	-1.14747108	1.763014724	-3.303141521	0.001727094	0.039155384	-1.359220432
SNORA80B	-1.217005288	4.691873606	-3.300450299	0.001740837	0.039293842	-1.366335458
LOC101805491	1.26316125	5.932995532	3.299342	0.001746527	0.039293842	-1.369264491
MLF1	-1.272561583	4.607744528	-3.296765142	0.001759824	0.039293842	-1.376072228
LINC01272	-1.393261189	4.428391154	-3.295678895	0.001765458	0.039293842	-1.378940941
SPERT	1.690789223	3.204271306	3.287140256	0.001810342	0.039554711	-1.401469891
CD48	-1.576961815	4.488880966	-3.286968813	0.001811254	0.039554711	-1.401921854
LOC728730	1.250553416	7.450574062	3.286628206	0.001813067	0.039554711	-1.40281973
TRPV6	1.117638829	11.64925101	3.283100877	0.001831949	0.039843871	-1.412114627
NOG	-1.845472982	8.183983949	-3.282664133	0.001834299	0.039843871	-1.413265048
ELMOD1	-1.285595415	1.288236007	-3.269136802	0.001908537	0.040750789	-1.448848533
LINC01123	1.418059815	2.738377231	3.266772893	0.001921797	0.040995974	-1.45505706
PRKAR1B	-1.085326657	5.879259522	-3.265821644	0.001927158	0.041034411	-1.457554586
NEBL-AS1	1.412024907	1.68339365	3.263094377	0.001942606	0.041249074	-1.464712488
LOC100132735	-1.671942613	4.897114695	-3.258942566	0.001966348	0.041485795	-1.475601795
NOX1	1.519684099	2.38765613	3.254067915	0.001994572	0.041869475	-1.48837552
TYRO3P	1.058695627	3.363955155	3.250786023	0.002013789	0.042093532	-1.496968551
RXFP3	1.119189558	1.337196937	3.249666336	0.002020386	0.042093532	-1.499898962
IL15	-1.416769903	6.4358829	-3.248294432	0.002028496	0.042094728	-1.503488575
CST6	-1.657747852	7.319753093	-3.247682934	0.00203212	0.042094728	-1.505088254
CCL23	-1.455771969	1.436854185	-3.243143593	0.00205922	0.042511736	-1.516957075
CXCR6	-1.043135896	7.770286755	-3.242749309	0.00206159	0.042522592	-1.517987485
HLA-DQA2	-2.000105263	4.635519112	-3.239460492	0.002081458	0.042779335	-1.526579203
CHAC2	-1.189783269	2.430099253	-3.229113501	0.002145149	0.04358631	-1.553572757
C1orf105	-1.221541485	1.046190305	-3.226699434	0.002160271	0.043736489	-1.559862559
CXCL9	-2.870144939	5.73989772	-3.224223418	0.002175886	0.043946427	-1.566310584
MYH13	1.506924162	3.076550301	3.224148821	0.002176358	0.043946427	-1.566504799
BOLA3	-1.052951531	6.582079686	-3.221966916	0.002190209	0.044097774	-1.57218414
NOX5	1.363844137	3.802507063	3.221800947	0.002191266	0.044097774	-1.572616041
PRIMA1	1.671476685	3.58624158	3.220550318	0.002199246	0.044215008	-1.575870096
ETV7	-1.082182865	5.205059952	-3.21854139	0.002212122	0.044357858	-1.58109547
USP30-AS1	-1.339127564	1.839933668	-3.218069492	0.002215157	0.044380123	-1.582322605
DEPDC7	-1.619062202	4.205058813	-3.216681186	0.002224108	0.044482166	-1.585932103
CHST2	-1.137058113	9.234404256	-3.213046414	0.002247706	0.044834837	-1.59537743
YJEFN3	1.20515635	5.365116803	3.205899408	0.002294795	0.045229033	-1.613929267
AGAP11	1.045340288	4.682494552	3.204663038	0.002303035	0.04535267	-1.617135828
HYALP1	1.191756034	2.939165835	3.195001384	0.002368391	0.046283972	-1.642165625
CCR2	-1.528674615	4.691687328	-3.186295843	0.002428771	0.047184049	-1.664675903
LEP	-2.482175298	10.36942103	-3.185492894	0.002434413	0.047187078	-1.666750084
OR5H14	-1.111123488	0.994717027	-3.180388638	0.002470565	0.047634809	-1.67992735
C1orf106	-1.519234551	5.250739126	-3.176746736	0.002496668	0.047857993	-1.689320839
LOC100507389	1.409043632	2.108307402	3.174417971	0.002513495	0.048100577	-1.695323651
PRKAG2-AS1	-1.398688926	1.995456703	-3.171571	0.002534211	0.048273337	-1.702658274
RS1	1.004921753	0.779449713	3.171451716	0.002535083	0.048273337	-1.702965491
HLA-DQB1	-1.51570562	7.598089748	-3.167092701	0.002567124	0.048762662	-1.714186857
SIT1	-1.419655265	1.986551391	-3.166231147	0.002573501	0.048803406	-1.716403538
HLF	1.076323497	7.467424321	3.157135258	0.00264175	0.049729595	-1.739781801
