# Supplementary material for: Integrated transcriptomic analysis and machine learning for characterizing diagnostic biomarkers and immune cell infiltration in fetal growth restriction
Source: Front Immunol. 2024 Sep 4;15:1381795. doi: 10.3389/fimmu.2024.1381795 (PMC11408188; doi:10.3389/fimmu.2024.1381795)
Supplement: Supplementary Table 4 — Details of the disease enrichment analysis (DO). [file Table4.xlsx]

## Sheet: DO_p_value
ID	Description	GeneRatio	BgRatio	pvalue	p.adjust	qvalue	geneID	Count
DOID:229	female reproductive system disease	18/139	421/10312	1.34843795436818e-05	0.00049218	0.000342594	SPINK1/SOD2/FSTL3/APOC1/TREM1/AQP9/HSD17B1/HAMP/CCK/PTPN22/CXCL8/NFIC/HLA-DRB1/STAR/POMC/ANG/IL15/LEP	18
DOID:2841	asthma	17/139	333/10312	2.2914788116497e-06	0.000236205	0.000164416	SOD2/CCL18/TAP1/CXCL10/PRG2/XDH/CXCL8/F2RL1/HLA-DRB1/ANG/TIMD4/CSF3/IL15/HLA-DQA2/CCR2/LEP/HLA-DQB1	17
DOID:1176	bronchial disease	17/139	344/10312	3.55881454997711e-06	0.000308749	0.000214912	SOD2/CCL18/TAP1/CXCL10/PRG2/XDH/CXCL8/F2RL1/HLA-DRB1/ANG/TIMD4/CSF3/IL15/HLA-DQA2/CCR2/LEP/HLA-DQB1	17
DOID:104	bacterial infectious disease	16/139	359/10312	2.54780335476193e-05	0.000730674	0.000508603	MARCO/TREM2/TREM1/IL23A/TAP1/CXCL10/PTPN22/CXCL8/HLA-DRB1/CD38/IL15/CXCR6/CXCL9/CCR2/LEP/HLA-DQB1	16
DOID:2237	hepatitis	16/139	452/10312	0.000374842	0.00486136	0.00338386	SOD2/APOC1/IL1R2/TAP1/HAMP/CXCL10/CLDN1/PTPN22/CXCL8/HLA-DRB1/POMC/FGG/CXCL9/CCR2/LEP/HLA-DQB1	16
DOID:10591	pre-eclampsia	15/139	309/10312	1.7146546159164e-05	0.000598638	0.000416696	SOD2/AQP9/TAP1/CP/CXCL10/XDH/CXCL8/F2RL1/POMC/TAC3/NOX1/IL15/CCR2/LEP/HLA-DQB1	15
DOID:5295	intestinal disease	15/139	417/10312	0.000486999	0.00566754	0.00394503	SOD2/ARTN/AQP9/CXCL10/CLDN1/PTPN22/CXCL8/NTRK2/HLA-DRB1/ANG/SLC15A1/IL15/CXCL9/LEP/HLA-DQB1	15
DOID:2994	germ cell cancer	15/139	439/10312	0.000828452	0.00862002	0.00600017	MUC4/SOD2/AQP9/HAMP/CLDN1/CXCL8/SFRP1/ANG/ASCL2/MT1F/PDZK1IP1/IL15/CCL23/CXCR6/LEP	15
DOID:2723	dermatitis	14/139	248/10312	6.05939117909317e-06	0.000308749	0.000214912	APOC1/CCL18/CXCL10/PRG2/COL17A1/EXPH5/CLDN1/F2RL1/HCN2/TNFAIP6/IL15/CCL23/CXCL9/CCR2	14
DOID:3082	interstitial lung disease	14/139	254/10312	7.97602361324406e-06	0.000337092	0.000234641	MARCO/SOD2/TREM1/CCL18/TAP1/HAMP/CXCL10/CXCL8/NTRK2/HLA-DRB1/IL15/CXCL9/CCR2/HLA-DQB1	14
DOID:1883	hepatitis C	14/139	258/10312	9.53583094464148e-06	0.000382864	0.000266501	SOD2/APOC1/TREM1/IL1R2/TAP1/HAMP/CXCL10/CLDN1/PTPN22/CXCL8/HLA-DRB1/CCR2/LEP/HLA-DQB1	14
DOID:0050338	primary bacterial infectious disease	14/139	295/10312	4.26214126907445e-05	0.00106953	0.000744473	MARCO/TREM2/TREM1/TAP1/CXCL10/PTPN22/CXCL8/HLA-DRB1/CD38/IL15/CXCL9/CCR2/LEP/HLA-DQB1	14
DOID:4766	embryoma	14/139	352/10312	0.000276562	0.00406528	0.00282974	MUC4/SOD2/AQP9/HAMP/CLDN1/CXCL8/SFRP1/ASCL2/MT1F/PDZK1IP1/IL15/CCL23/CXCR6/LEP	14
DOID:688	embryonal cancer	14/139	378/10312	0.00056666	0.00650041	0.00452476	MUC4/SOD2/AQP9/HAMP/CLDN1/CXCL8/SFRP1/ASCL2/MT1F/PDZK1IP1/IL15/CCL23/CXCR6/LEP	14
DOID:326	ischemia	14/139	464/10312	0.00389683	0.0280169	0.0195018	SLC9A1/SERPINA3/SOD2/ADORA3/ESRRG/CP/HAMP/CXCL10/XDH/CXCL8/MT1F/ASIC3/CD38/CSF3	14
DOID:4450	renal cell carcinoma	14/139	472/10312	0.00453166	0.0303244	0.021108	SPINK1/SOD2/APOC1/HAMP/CLDN1/CXCL8/SFRP1/HLA-DRB1/EGLN3/ANG/FABP7/VTCN1/LEP/HLA-DQB1	14
DOID:423	myopathy	14/139	498/10312	0.00719831	0.0415845	0.0289459	BIN2/SOD2/CXCL10/PRG2/PTPN22/CXCL8/HLA-DRB1/MUSK/NOG/IL15/MYH13/CCR2/LEP/HLA-DQB1	14
DOID:1398	parasitic infectious disease	13/139	208/10312	4.38572663471446e-06	0.000308749	0.000214912	TREM1/CCL18/TAP1/HAMP/CXCL10/PRG2/PTPN22/CXCL8/ACE2/HLA-DRB1/IL15/CXCL9/HLA-DQB1	13
DOID:6000	congestive heart failure	13/139	355/10312	0.000993894	0.00950116	0.00661351	SLC9A1/SOD2/FSTL3/TREM1/HAMP/ACE2/POMC/ANG/FOXP4/CSF3/NOX5/CCR2/LEP	13
DOID:2789	parasitic protozoa infectious disease	12/139	178/10312	4.79232329280553e-06	0.000308749	0.000214912	TREM1/CCL18/HAMP/CXCL10/PRG2/PTPN22/CXCL8/ACE2/HLA-DRB1/IL15/CXCL9/HLA-DQB1	12
DOID:4989	pancreatitis	12/139	185/10312	7.12966238384116e-06	0.000323634	0.000225273	SPINK1/SOD2/TREM1/CXCL10/GCH1/XDH/CXCL8/HLA-DRB1/FGG/IL15/LEP/HLA-DQB1	12
DOID:26	pancreas disease	12/139	196/10312	1.28340286354852e-05	0.000490749	0.000341597	SPINK1/SOD2/TREM1/CXCL10/GCH1/XDH/CXCL8/HLA-DRB1/FGG/IL15/LEP/HLA-DQB1	12
DOID:526	human immunodeficiency virus infectious disease	12/139	222/10312	4.42429310253015e-05	0.00107252	0.000746551	HEXB/SOD2/TREM1/CCL18/CXCL10/CXCL8/HLA-DRB1/IL15/CXCR6/CCR2/LEP/HLA-DQB1	12
DOID:3083	chronic obstructive pulmonary disease	12/139	304/10312	0.000816521	0.00862002	0.00600017	SERPINA3/SOD2/TREM1/CXCL10/XDH/CXCL8/F2RL1/ANG/CSF3/CXCR6/CXCL9/LEP	12
DOID:2320	obstructive lung disease	12/139	305/10312	0.000840287	0.00862002	0.00600017	SERPINA3/SOD2/TREM1/CXCL10/XDH/CXCL8/F2RL1/ANG/CSF3/CXCR6/CXCL9/LEP	12
DOID:6713	cerebrovascular disease	12/139	337/10312	0.00197022	0.0164133	0.0114249	SLC9A1/SOD2/TREM1/HAMP/CXCL10/XDH/PKD1/ACE2/ANG/CSF3/IL15/LEP	12
DOID:5082	liver cirrhosis	12/139	354/10312	0.00295641	0.0223962	0.0155894	SERPINA3/SOD2/HAMP/CXCL10/CLDN1/PTPN22/CXCL8/ACE2/HLA-DRB1/CXCL9/LEP/HLA-DQB1	12
DOID:13141	uveitis	11/139	78/10312	6.45462234447514e-09	5.18306174261354e-06	3.6077941735961e-06	SERPINA3/SOD2/CCL18/CXCL10/HLA-DQB2/PTPN22/HLA-DRB1/POMC/HLA-DQA2/CCR2/HLA-DQB1	11
DOID:3480	uveal disease	11/139	87/10312	2.09611983113261e-08	8.41592112199742e-06	5.85810331753376e-06	SERPINA3/SOD2/CCL18/CXCL10/HLA-DQB2/PTPN22/HLA-DRB1/POMC/HLA-DQA2/CCR2/HLA-DQB1	11
DOID:1564	fungal infectious disease	11/139	111/10312	2.69047970027422e-07	7.20151733106734e-05	5.01278849419513e-05	SOD2/IL23A/CXCL10/HLA-DQB2/PTPN22/CXCL8/HLA-DRB1/IL15/CXCR6/CCR2/HLA-DQB1	11
DOID:0060056	hypersensitivity reaction disease	11/139	152/10312	6.15191042351223e-06	0.000308749	0.000214912	CCL18/CP/CXCL10/PTPN22/ACE2/HLA-DRB1/CSF3/IL15/CXCL9/CCR2/HLA-DQB1	11
DOID:3310	atopic dermatitis	11/139	183/10312	3.5428490450409e-05	0.000948303	0.000660089	APOC1/CCL18/CXCL10/PRG2/CLDN1/F2RL1/TNFAIP6/IL15/CCL23/CXCL9/CCR2	11
DOID:3042	allergic contact dermatitis	11/139	192/10312	5.49957783358925e-05	0.00119356	0.000830804	APOC1/CCL18/CXCL10/PRG2/CLDN1/F2RL1/TNFAIP6/IL15/CCL23/CXCL9/CCR2	11
DOID:9744	type 1 diabetes mellitus	11/139	192/10312	5.49957783358925e-05	0.00119356	0.000830804	SOD2/TAP1/CP/CXCL10/PTPN22/CXCL8/HLA-DRB1/CD38/IL15/CCR2/HLA-DQB1	11
DOID:2773	contact dermatitis	11/139	195/10312	6.33102733221487e-05	0.00133785	0.00093124	APOC1/CCL18/CXCL10/PRG2/CLDN1/F2RL1/TNFAIP6/IL15/CCL23/CXCL9/CCR2	11
DOID:399	tuberculosis	11/139	201/10312	8.32199698147519e-05	0.00159109	0.00110751	MARCO/TREM1/TAP1/CXCL10/PTPN22/CXCL8/HLA-DRB1/IL15/CXCL9/CCR2/HLA-DQB1	11
DOID:974	upper respiratory tract disease	11/139	202/10312	8.70115780762917e-05	0.00162489	0.00113104	MUC4/IL23A/TAP1/CXCL10/CXCL8/F2RL1/ANG/NOX1/CCR2/LEP/HLA-DQB1	11
DOID:50	thyroid gland disease	11/139	232/10312	0.000293694	0.00407998	0.00283997	SLC9A1/DIO2/SOD2/CP/CXCL10/PTPN22/HLA-DRB1/STAR/CXCL9/LEP/HLA-DQB1	11
DOID:3324	mood disorder	11/139	295/10312	0.00211745	0.0171749	0.011955	DIO2/MC1R/TREM1/GCH1/CXCL8/ANK3/NTRK2/POMC/FABP7/HCAR3/TRPV6	11
DOID:9455	lipid storage disease	11/139	305/10312	0.0027434	0.021337	0.0148521	SCD/HEXB/SOD2/APOC1/CCL18/HAMP/CXCL10/CLDN1/STAR/CCR2/LEP	11
DOID:3211	lysosomal storage disease	11/139	346/10312	0.0070414	0.0409728	0.0285201	SCD/HEXB/SOD2/APOC1/CCL18/HAMP/CXCL10/CLDN1/STAR/CCR2/LEP	11
DOID:0070004	myeloid neoplasm	11/139	371/10312	0.0115444	0.0538961	0.0375157	SOD2/APOC1/HAMP/PRG2/CXCL8/SFRP1/ANG/FGG/SLAMF7/NOG/IL15	11
DOID:12236	primary biliary cholangitis	10/139	123/10312	5.88092922432245e-06	0.000308749	0.000214912	SOD2/HAMP/CXCL10/PTPN22/CXCL8/ACE2/HLA-DRB1/CXCL9/LEP/HLA-DQB1	10
DOID:0080599	Coronavirus infectious disease	10/139	143/10312	2.2279135815555e-05	0.000688083	0.000478956	SERPINA3/MUC4/CXCL10/CXCL8/ACE2/HLA-DRB1/POMC/CSF3/CXCL9/CCR2	10
DOID:865	vasculitis	10/139	154/10312	4.22097368471962e-05	0.00106953	0.000744473	SERPINA3/SOD2/IL23A/TXK/PTPN22/CXCL8/HLA-DRB1/IL15/LEP/HLA-DQB1	10
DOID:9741	biliary tract disease	10/139	197/10312	0.000324112	0.00441122	0.00307053	MUC4/TREM1/CP/HAMP/CXCL10/XDH/CLDN1/CXCL8/HLA-DRB1/HLA-DQB1	10
DOID:1575	rheumatic disease	10/139	238/10312	0.00140222	0.0123734	0.00861283	TREM1/CCL18/TAP1/CXCL10/PTPN22/IL27RA/HLA-DRB1/CXCR6/CXCL9/CCR2	10
DOID:418	systemic scleroderma	10/139	238/10312	0.00140222	0.0123734	0.00861283	TREM1/CCL18/TAP1/CXCL10/PTPN22/IL27RA/HLA-DRB1/CXCR6/CXCL9/CCR2	10
DOID:419	scleroderma	10/139	238/10312	0.00140222	0.0123734	0.00861283	TREM1/CCL18/TAP1/CXCL10/PTPN22/IL27RA/HLA-DRB1/CXCR6/CXCL9/CCR2	10
DOID:5041	esophageal cancer	10/139	255/10312	0.00233461	0.0183793	0.0127934	MUC4/SOD2/RARRES1/TAP1/CLDN1/CXCL8/SFRP1/HLA-DRB1/CYP26A1/NOX5	10
DOID:1100	ovarian disease	10/139	261/10312	0.00276345	0.021337	0.0148521	APOC1/AQP9/HSD17B1/HAMP/CCK/CXCL8/NFIC/STAR/POMC/LEP	10
DOID:2957	pulmonary tuberculosis	9/139	86/10312	2.16230777522637e-06	0.000236205	0.000164416	MARCO/TREM1/TAP1/CXCL10/PTPN22/CXCL8/HLA-DRB1/IL15/HLA-DQB1	9
DOID:13241	Behcet's disease	9/139	113/10312	2.06457371424015e-05	0.000663141	0.000461595	SOD2/IL23A/TXK/PTPN22/CXCL8/HLA-DRB1/IL15/LEP/HLA-DQB1	9
DOID:633	myositis	9/139	113/10312	2.06457371424015e-05	0.000663141	0.000461595	SOD2/PRG2/CXCL8/HLA-DRB1/NOG/IL15/MYH13/CCR2/HLA-DQB1	9
DOID:289	endometriosis	9/139	125/10312	4.61341423782102e-05	0.00107252	0.000746551	SPINK1/FSTL3/HSD17B1/PTPN22/CXCL8/HLA-DRB1/ANG/IL15/LEP	9
DOID:1459	hypothyroidism	9/139	146/10312	0.000153539	0.00262819	0.00182942	SLC9A1/DIO2/SOD2/PTPN22/HLA-DRB1/STAR/CXCL9/LEP/HLA-DQB1	9
DOID:4483	rhinitis	9/139	156/10312	0.000252946	0.00398266	0.00277223	IL23A/TAP1/CXCL8/F2RL1/ANG/NOX1/CCR2/LEP/HLA-DQB1	9
DOID:2163	nasal cavity disease	9/139	157/10312	0.000265302	0.00406528	0.00282974	IL23A/TAP1/CXCL8/F2RL1/ANG/NOX1/CCR2/LEP/HLA-DQB1	9
DOID:1686	glaucoma	9/139	167/10312	0.000418833	0.00525504	0.0036579	SOD2/TAP1/HAMP/XDH/ACE2/SFRP1/NTRK2/HLA-DRB1/HLA-DQB1	9
DOID:2825	nose disease	9/139	168/10312	0.000437554	0.00532357	0.0037056	IL23A/TAP1/CXCL8/F2RL1/ANG/NOX1/CCR2/LEP/HLA-DQB1	9
DOID:1485	cystic fibrosis	9/139	183/10312	0.000811743	0.00862002	0.00600017	MARCO/SERPINA3/SPINK1/MUC4/TREM1/TAP1/CXCL8/CXCL9/LEP	9
DOID:11612	polycystic ovary syndrome	9/139	188/10312	0.000982997	0.00950116	0.00661351	APOC1/AQP9/HSD17B1/HAMP/CCK/NFIC/STAR/POMC/LEP	9
DOID:4138	bile duct disease	9/139	195/10312	0.00127097	0.0118673	0.00826054	TREM1/CP/HAMP/CXCL10/XDH/CLDN1/CXCL8/HLA-DRB1/HLA-DQB1	9
DOID:1414	ovarian dysfunction	9/139	199/10312	0.00146394	0.0126403	0.00879855	APOC1/AQP9/HSD17B1/HAMP/CCK/NFIC/STAR/POMC/LEP	9
DOID:1107	esophageal carcinoma	9/139	219/10312	0.00281274	0.0215108	0.0149731	MUC4/SOD2/RARRES1/TAP1/CXCL8/SFRP1/HLA-DRB1/CYP26A1/NOX5	9
DOID:9452	fatty liver disease	9/139	232/10312	0.00412069	0.0289902	0.0201794	SCD/SOD2/APOC1/HAMP/CXCL10/CLDN1/STAR/CCR2/LEP	9
DOID:576	proteinuria	9/139	247/10312	0.00617578	0.0375693	0.026151	SLC9A1/SOD2/CXCL10/CXCL8/ACE2/HLA-DRB1/STAR/LEP/HLA-DQB1	9
DOID:3213	demyelinating disease	9/139	259/10312	0.00832761	0.0454903	0.0316646	CXCL10/PTPN22/CXCL8/F2RL1/HLA-DRB1/NOG/CCR2/LEP/HLA-DQB1	9
DOID:3910	lung adenocarcinoma	9/139	263/10312	0.009159	0.0468593	0.0326175	SCD/SERPINA3/MUC4/SOD2/GALNT3/CXCL8/ANG/EPHB6/CSF3	9
DOID:403	mouth disease	9/139	266/10312	0.00982281	0.0483909	0.0336836	SPINK1/TREM1/IL1R2/CLDN1/CXCL8/F2RL1/IL15/CCR2/HLA-DQB1	9
DOID:2473	opportunistic mycosis	8/139	65/10312	2.35322652909811e-06	0.000236205	0.000164416	CXCL10/HLA-DQB2/PTPN22/CXCL8/HLA-DRB1/IL15/CXCR6/HLA-DQB1	8
DOID:0050136	systemic mycosis	8/139	73/10312	5.72447785341689e-06	0.000308749	0.000214912	CXCL10/HLA-DQB2/PTPN22/CXCL8/HLA-DRB1/IL15/CXCR6/HLA-DQB1	8
DOID:11162	respiratory failure	8/139	102/10312	6.72882880757604e-05	0.00138545	0.000964375	SERPINA3/SOD2/CXCL10/CXCL8/F2RL1/IL15/CCR2/LEP	8
DOID:12361	Graves' disease	8/139	103/10312	7.21357466627009e-05	0.00142053	0.000988797	TAP1/CXCL10/PTPN22/CXCL8/HLA-DRB1/CXCR6/CXCL9/HLA-DQB1	8
DOID:11335	sarcoidosis	8/139	116/10312	0.000166454	0.00278464	0.00193831	CCL18/CXCL10/ACE2/HLA-DRB1/IL15/CXCL9/CCR2/HLA-DQB1	8
DOID:0060005	autoimmune disease of endocrine system	8/139	122/10312	0.000235788	0.00378676	0.00263586	TAP1/CXCL10/PTPN22/CXCL8/HLA-DRB1/CXCR6/CXCL9/HLA-DQB1	8
DOID:12365	malaria	8/139	125/10312	0.000278444	0.00406528	0.00282974	TREM1/CCL18/HAMP/CXCL10/ACE2/HLA-DRB1/CXCL9/HLA-DQB1	8
DOID:2916	hypersensitivity reaction type IV disease	8/139	130/10312	0.00036345	0.00486136	0.00338386	CCL18/CXCL10/ACE2/HLA-DRB1/IL15/CXCL9/CCR2/HLA-DQB1	8
DOID:8947	diabetic retinopathy	8/139	158/10312	0.00131409	0.0121289	0.00844262	SOD2/CXCL10/CLDN1/CXCL8/ACE2/HLA-DRB1/ANG/HLA-DQB1	8
DOID:2462	retinal vascular disease	8/139	166/10312	0.0017992	0.015208	0.0105859	SOD2/CXCL10/CLDN1/CXCL8/ACE2/HLA-DRB1/ANG/HLA-DQB1	8
DOID:3388	periodontal disease	8/139	169/10312	0.00201391	0.0165017	0.0114864	TREM1/IL1R2/CLDN1/CXCL8/F2RL1/IL15/CCR2/HLA-DQB1	8
DOID:3454	brain infarction	8/139	220/10312	0.0097713	0.0483909	0.0336836	SLC9A1/TREM1/HAMP/CXCL10/ACE2/ANG/CSF3/IL15	8
DOID:1247	blood coagulation disease	8/139	235/10312	0.0141338	0.0623595	0.0434068	CP/CXCL10/PTPN22/CXCL8/HLA-DRB1/FGG/LEP/HLA-DQB1	8
DOID:10113	trypanosomiasis	7/139	41/10312	1.06561191948427e-06	0.000171137	0.000119124	CCL18/CXCL10/PRG2/PTPN22/CXCL8/HLA-DRB1/IL15	7
DOID:13406	pulmonary sarcoidosis	7/139	54/10312	7.2545501709239e-06	0.000323634	0.000225273	CCL18/CXCL10/ACE2/HLA-DRB1/IL15/CXCL9/HLA-DQB1	7
DOID:2945	severe acute respiratory syndrome	7/139	65/10312	2.52097123814007e-05	0.000730674	0.000508603	SERPINA3/CXCL10/CXCL8/ACE2/HLA-DRB1/POMC/CXCL9	7
DOID:11394	adult respiratory distress syndrome	7/139	67/10312	3.07931704601957e-05	0.000852652	0.000593509	SERPINA3/SOD2/CXCL10/CXCL8/IL15/CCR2/LEP	7
DOID:12306	vitiligo	7/139	85/10312	0.000142896	0.0025499	0.00177492	SOD2/TAP1/PTPN22/F2RL1/HLA-DRB1/POMC/HLA-DQB1	7
DOID:7147	ankylosing spondylitis	7/139	86/10312	0.00015383	0.00262819	0.00182942	SOD2/IL23A/TAP1/RGS1/HLA-DRB1/LEP/HLA-DQB1	7
DOID:0060031	autoimmune disease of gastrointestinal tract	7/139	123/10312	0.00134632	0.0122852	0.00855141	UBD/PTPN22/CXCL8/HLA-DRB1/POMC/IL15/HLA-DQB1	7
DOID:824	periodontitis	7/139	147/10312	0.00369761	0.0269926	0.0187888	TREM1/IL1R2/CLDN1/CXCL8/F2RL1/CCR2/HLA-DQB1	7
DOID:13580	cholestasis	7/139	161/10312	0.0060645	0.03746	0.0260749	CP/HAMP/CXCL10/XDH/CXCL8/HLA-DRB1/HLA-DQB1	7
DOID:552	pneumonia	7/139	164/10312	0.00669266	0.0398089	0.02771	TREM1/CCL18/TAP1/CXCL8/CSF3/CXCR6/CXCL9	7
DOID:3146	lipid metabolism disorder	7/139	182/10312	0.0115259	0.0538961	0.0375157	SCD/APOC1/CP/XDH/CXCL8/STAR/LEP	7
DOID:3312	bipolar disorder	7/139	184/10312	0.0121872	0.0565682	0.0393757	DIO2/GCH1/ANK3/NTRK2/FABP7/HCAR3/TRPV6	7
DOID:9074	systemic lupus erythematosus	7/139	192/10312	0.0151083	0.0641904	0.0446813	SOD2/TAP1/HAMP/PTPN22/HLA-DRB1/TIMD4/HLA-DQB1	7
DOID:3770	pulmonary fibrosis	7/139	198/10312	0.017605	0.0710395	0.0494487	TREM1/CCL18/CXCL10/CXCL8/NTRK2/HLA-DRB1/IL15	7
DOID:8857	lupus erythematosus	7/139	198/10312	0.017605	0.0710395	0.0494487	SOD2/TAP1/HAMP/PTPN22/HLA-DRB1/TIMD4/HLA-DQB1	7
DOID:12030	panuveitis	6/139	33/10312	4.41945072335716e-06	0.000308749	0.000214912	SOD2/CCL18/PTPN22/HLA-DRB1/CCR2/HLA-DQB1	6
DOID:11981	morbid obesity	6/139	49/10312	4.67473014544747e-05	0.00107252	0.000746551	SCD/AQP9/CCK/NTRK2/POMC/LEP	6
DOID:1555	urticaria	6/139	55/10312	9.0699318421908e-05	0.00165526	0.00115219	SOD2/ADORA3/PTPN22/HLA-DRB1/CCR2/HLA-DQB1	6
DOID:1067	open-angle glaucoma	6/139	83/10312	0.000867715	0.00870969	0.00606259	SOD2/TAP1/HAMP/NTRK2/HLA-DRB1/HLA-DQB1	6
DOID:10608	celiac disease	6/139	92/10312	0.00148521	0.0126875	0.00883142	UBD/PTPN22/CXCL8/HLA-DRB1/IL15/HLA-DQB1	6
DOID:6050	esophageal disease	6/139	99/10312	0.0021617	0.0172906	0.0120355	SOD2/CXCL8/SFRP1/ANG/IL15/HLA-DQB1	6
DOID:3627	aortic aneurysm	6/139	113/10312	0.00418294	0.0289902	0.0201794	SOD2/CXCL10/CXCL8/HLA-DRB1/CXCL9/LEP	6
DOID:520	aortic disease	6/139	116/10312	0.00475437	0.0312931	0.0217823	SOD2/CXCL10/CXCL8/HLA-DRB1/CXCL9/LEP	6
DOID:4481	allergic rhinitis	6/139	117/10312	0.00495704	0.0321009	0.0223446	IL23A/TAP1/CXCL8/F2RL1/NOX1/LEP	6
DOID:0080208	non-alcoholic fatty liver disease	6/139	120/10312	0.00560323	0.0354283	0.0246607	SOD2/HAMP/CXCL10/CLDN1/CCR2/LEP	6
DOID:1168	familial hyperlipidemia	6/139	124/10312	0.00655808	0.0392996	0.0273554	SCD/APOC1/CP/XDH/CXCL8/LEP	6
DOID:3525	middle cerebral artery infarction	6/139	127/10312	0.00734813	0.0421468	0.0293373	SLC9A1/TREM1/HAMP/CXCL10/ACE2/CSF3	6
DOID:11476	osteoporosis	6/139	136/10312	0.0101304	0.0493015	0.0343175	QPCT/SOD2/CA10/POMC/IL15/LEP	6
DOID:0080011	bone resorption disease	6/139	137/10312	0.0104801	0.050696	0.0352882	QPCT/SOD2/CA10/POMC/IL15/LEP	6
DOID:6196	reactive arthritis	5/139	14/10312	7.51830566504486e-07	0.00015093	0.000105058	SOD2/TAP1/CXCL10/CXCL8/HLA-DRB1	5
DOID:12140	Chagas disease	5/139	33/10312	7.25303769805676e-05	0.00142053	0.000988797	CCL18/PRG2/PTPN22/HLA-DRB1/IL15	5
DOID:2021	placenta cancer	5/139	44/10312	0.000294693	0.00407998	0.00283997	DIO2/NTRK2/ANG/ASCL2/LEP	5
DOID:3594	choriocarcinoma	5/139	44/10312	0.000294693	0.00407998	0.00283997	DIO2/NTRK2/ANG/ASCL2/LEP	5
DOID:437	myasthenia gravis	5/139	47/10312	0.000402989	0.00513651	0.00357539	CXCL10/PTPN22/HLA-DRB1/MUSK/HLA-DQB1	5
DOID:9471	meningitis	5/139	48/10312	0.000445025	0.00533366	0.00371262	MARCO/TREM1/CXCL8/HCN2/HLA-DRB1	5
DOID:7166	thyroiditis	5/139	53/10312	0.000706723	0.0076689	0.00533812	CXCL10/PTPN22/HLA-DRB1/CXCL9/HLA-DQB1	5
DOID:10316	pneumoconiosis	5/139	57/10312	0.000987737	0.00950116	0.00661351	MARCO/SOD2/HAMP/HLA-DRB1/HLA-DQB1	5
DOID:438	autoimmune disease of the nervous system	5/139	74/10312	0.00316666	0.0233287	0.0162385	CXCL10/PTPN22/HLA-DRB1/MUSK/HLA-DQB1	5
DOID:0050339	commensal bacterial infectious disease	5/139	81/10312	0.00467362	0.0310159	0.0215893	TREM1/IL23A/CXCL8/HLA-DRB1/CXCR6	5
DOID:0080600	COVID-19	5/139	82/10312	0.00492426	0.0321009	0.0223446	CXCL10/CXCL8/ACE2/CSF3/CXCL9	5
DOID:345	uterine disease	5/139	83/10312	0.00518429	0.0333039	0.023182	SOD2/TREM1/AQP9/CXCL8/LEP	5
DOID:635	acquired immunodeficiency syndrome	5/139	85/10312	0.00573331	0.0359675	0.0250361	CCL18/CXCL10/CXCR6/CCR2/LEP	5
DOID:8893	psoriasis	5/139	87/10312	0.00632215	0.0381705	0.0265695	SOD2/TAP1/PTPN22/CCR2/HLA-DQB1	5
DOID:76	stomach disease	5/139	89/10312	0.00695226	0.0407494	0.0283646	TREM1/XDH/CXCL8/HLA-DRB1/HLA-DQB1	5
DOID:381	arthropathy	5/139	97/10312	0.00991372	0.0485409	0.0337881	SOD2/IL23A/RGS1/NOG/LEP	5
DOID:12894	Sjogren's syndrome	5/139	110/10312	0.0164036	0.0677842	0.0471828	COL17A1/XDH/PTPN22/HLA-DRB1/HLA-DQB1	5
DOID:8778	Crohn's disease	5/139	110/10312	0.0164036	0.0677842	0.0471828	CLDN1/PTPN22/CXCL8/CXCL9/HLA-DQB1	5
DOID:676	juvenile rheumatoid arthritis	4/139	23/10312	0.000229404	0.00375942	0.00261683	TREM1/PTPN22/HLA-DRB1/HLA-DQB1	4
DOID:1407	anterior uveitis	4/139	26/10312	0.000375348	0.00486136	0.00338386	SOD2/CCL18/PTPN22/HLA-DQB1	4
DOID:7188	autoimmune thyroiditis	4/139	27/10312	0.000436047	0.00532357	0.0037056	CXCL10/PTPN22/HLA-DRB1/HLA-DQB1	4
DOID:321	tropical spastic paraparesis	4/139	29/10312	0.000577923	0.00653623	0.0045497	CXCL8/HLA-DRB1/IL15/HLA-DQB1	4
DOID:9809	hypersensitivity vasculitis	4/139	32/10312	0.000848047	0.00862002	0.00600017	CP/PTPN22/HLA-DRB1/CSF3	4
DOID:1557	hypersensitivity reaction type III disease	4/139	35/10312	0.00119682	0.0113064	0.0078701	CP/PTPN22/HLA-DRB1/CSF3	4
DOID:9446	cholangitis	4/139	41/10312	0.00217478	0.0172906	0.0120355	TREM1/CLDN1/HLA-DRB1/HLA-DQB1	4
DOID:11077	brucellosis	4/139	45/10312	0.00306959	0.022823	0.0158865	TAP1/PTPN22/CXCL8/LEP	4
DOID:1024	leprosy	4/139	49/10312	0.00418788	0.0289902	0.0201794	PTPN22/CXCL8/HLA-DRB1/HLA-DQB1	4
DOID:4914	esophagus adenocarcinoma	4/139	54/10312	0.00593598	0.0369504	0.0257202	SOD2/SFRP1/CYP26A1/NOX5	4
DOID:1891	optic nerve disease	4/139	56/10312	0.00675309	0.039873	0.0277546	SOD2/HLA-DRB1/CSF3/HLA-DQB1	4
DOID:1070	primary open angle glaucoma	4/139	62/10312	0.00964167	0.0483909	0.0336836	SOD2/TAP1/HAMP/NTRK2	4
DOID:4971	myelofibrosis	4/139	62/10312	0.00964167	0.0483909	0.0336836	PRG2/CXCL8/NOG/IL15	4
DOID:10923	sickle cell anemia	4/139	65/10312	0.0113462	0.0538961	0.0375157	SCD/HLA-DRB1/LEP/HLA-DQB1	4
DOID:10241	thalassemia	4/139	67/10312	0.0125839	0.0572695	0.0398638	DLX4/HAMP/CXCL8/HLA-DQB1	4
DOID:6590	spondylitis	4/139	68/10312	0.0132338	0.0590375	0.0410945	SOD2/IL23A/RGS1/LEP	4
DOID:1588	thrombocytopenia	4/139	71/10312	0.0153106	0.0643688	0.0448055	CP/CXCL10/PTPN22/CXCL8	4
DOID:620	blood protein disease	4/139	71/10312	0.0153106	0.0643688	0.0448055	SCD/HLA-DRB1/LEP/HLA-DQB1	4
DOID:3326	purpura	4/139	72/10312	0.016046	0.067109	0.0467128	CP/PTPN22/HLA-DRB1/LEP	4
DOID:11339	pneumocystosis	3/139	10/10312	0.00026836	0.00406528	0.00282974	HLA-DQB2/CXCR6/HLA-DQB1	3
DOID:8986	narcolepsy	3/139	12/10312	0.000482349	0.00566754	0.00394503	HLA-DRB1/LEP/HLA-DQB1	3
DOID:1210	optic neuritis	3/139	13/10312	0.000620883	0.00682971	0.00475399	SOD2/HLA-DRB1/HLA-DQB1	3
DOID:1496	echinococcosis	3/139	13/10312	0.000620883	0.00682971	0.00475399	TAP1/HLA-DRB1/HLA-DQB1	3
DOID:13774	Addison's disease	3/139	15/10312	0.00096844	0.00950116	0.00661351	PTPN22/HLA-DRB1/HLA-DQB1	3
DOID:10493	adrenal cortical hypofunction	3/139	17/10312	0.00141905	0.0123859	0.00862147	PTPN22/HLA-DRB1/HLA-DQB1	3
DOID:0080841	pemphigoid	3/139	19/10312	0.00198268	0.0164133	0.0114249	COL17A1/HLA-DRB1/HLA-DQB1	3
DOID:3952	adrenal cortex disease	3/139	22/10312	0.00305933	0.022823	0.0158865	PTPN22/HLA-DRB1/HLA-DQB1	3
DOID:8924	autoimmune thrombocytopenic purpura	3/139	24/10312	0.0039426	0.0280169	0.0195018	PTPN22/HLA-DRB1/HLA-DQB1	3
DOID:8925	primary thrombocytopenia	3/139	24/10312	0.0039426	0.0280169	0.0195018	PTPN22/HLA-DRB1/HLA-DQB1	3
DOID:0060050	autoimmune disease of blood	3/139	25/10312	0.00443646	0.0299368	0.0208382	PTPN22/HLA-DRB1/HLA-DQB1	3
DOID:14268	sclerosing cholangitis	3/139	25/10312	0.00443646	0.0299368	0.0208382	CLDN1/HLA-DRB1/HLA-DQB1	3
DOID:1508	candidiasis	3/139	25/10312	0.00443646	0.0299368	0.0208382	CXCL10/PTPN22/CXCL8	3
DOID:841	extrinsic allergic alveolitis	3/139	27/10312	0.00553243	0.0352583	0.0245424	TAP1/CXCL10/CXCL9	3
DOID:13564	aspergillosis	3/139	28/10312	0.00613591	0.0375693	0.026151	HLA-DRB1/IL15/HLA-DQB1	3
DOID:14018	alcoholic liver cirrhosis	3/139	30/10312	0.00745692	0.0421684	0.0293523	SOD2/CXCL8/LEP	3
DOID:640	encephalomyelitis	3/139	30/10312	0.00745692	0.0421684	0.0293523	CXCL10/HLA-DRB1/HLA-DQB1	3
DOID:11123	Henoch-Schoenlein purpura	3/139	31/10312	0.00817554	0.0449655	0.0312993	CP/PTPN22/HLA-DRB1	3
DOID:14067	Plasmodium falciparum malaria	3/139	31/10312	0.00817554	0.0449655	0.0312993	HAMP/HLA-DRB1/HLA-DQB1	3
DOID:3429	inclusion body myositis	3/139	31/10312	0.00817554	0.0449655	0.0312993	SOD2/MYH13/CCR2	3
DOID:0060262	gallbladder disease	3/139	32/10312	0.00893356	0.0468593	0.0326175	APOC1/CCK/LEP	3
DOID:10211	cholelithiasis	3/139	32/10312	0.00893356	0.0468593	0.0326175	APOC1/CCK/LEP	3
DOID:2799	bronchiolitis obliterans	3/139	32/10312	0.00893356	0.0468593	0.0326175	CXCL10/CXCL8/CXCL9	3
DOID:0080547	non-alcoholic steatohepatitis	3/139	33/10312	0.00973141	0.0483909	0.0336836	SOD2/CXCL10/CLDN1	3
DOID:10325	silicosis	3/139	33/10312	0.00973141	0.0483909	0.0336836	MARCO/HLA-DRB1/HLA-DQB1	3
DOID:8283	peritonitis	3/139	34/10312	0.0105695	0.0508222	0.035376	TREM1/XDH/CXCL8	3
DOID:12241	beta thalassemia	3/139	35/10312	0.0114482	0.0538961	0.0375157	HAMP/CXCL8/HLA-DQB1	3
DOID:0060039	autoimmune disease of skin and connective tissue	3/139	36/10312	0.0123678	0.0570767	0.0397296	COL17A1/HLA-DRB1/HLA-DQB1	3
DOID:4251	conjunctival disease	3/139	37/10312	0.0133286	0.0591319	0.0411602	MUC4/CXCL8/TNFAIP6	3
DOID:1852	intrahepatic cholestasis	3/139	38/10312	0.0143309	0.0625419	0.0435338	CXCL8/HLA-DRB1/HLA-DQB1	3
DOID:811	lipodystrophy	3/139	38/10312	0.0143309	0.0625419	0.0435338	DIO2/CXCL8/LEP	3
DOID:0050032	mineral metabolism disease	3/139	40/10312	0.0164607	0.0677842	0.0471828	CP/GALNT3/HLF	3
DOID:0050784	primary progressive multiple sclerosis	2/139	10/10312	0.00756243	0.0424659	0.0295594	HLA-DRB1/HLA-DQB1	2
DOID:0050827	rheumatic heart disease	2/139	11/10312	0.00916178	0.0468593	0.0326175	HLA-DRB1/HLA-DQB1	2
DOID:0060004	autoimmune disease of central nervous system	2/139	11/10312	0.00916178	0.0468593	0.0326175	HLA-DRB1/HLA-DQB1	2
DOID:10772	thrombotic thrombocytopenic purpura	2/139	11/10312	0.00916178	0.0468593	0.0326175	HLA-DRB1/HLA-DQB1	2
DOID:8568	infectious mononucleosis	2/139	11/10312	0.00916178	0.0468593	0.0326175	SOD2/HLA-DRB1	2
DOID:8691	mycosis fungoides	2/139	11/10312	0.00916178	0.0468593	0.0326175	SOD2/HLA-DQB1	2
DOID:8869	neuromyelitis optica	2/139	11/10312	0.00916178	0.0468593	0.0326175	HLA-DRB1/HLA-DQB1	2
DOID:1586	rheumatic fever	2/139	12/10312	0.0108977	0.0520882	0.0362573	HLA-DRB1/HLA-DQB1	2
DOID:0080822	aspirin-induced respiratory disease	2/139	13/10312	0.0127662	0.0572695	0.0398638	HLA-DRB1/HLA-DQB1	2
DOID:12297	Vogt-Koyanagi-Harada disease	2/139	13/10312	0.0127662	0.0572695	0.0398638	HLA-DRB1/HLA-DQB1	2
DOID:2988	antiphospholipid syndrome	2/139	13/10312	0.0127662	0.0572695	0.0398638	HLA-DRB1/HLA-DQB1	2
DOID:4988	alcoholic pancreatitis	2/139	13/10312	0.0127662	0.0572695	0.0398638	SPINK1/SOD2	2
DOID:1019	osteomyelitis	2/139	14/10312	0.0147635	0.0630588	0.0438936	HLA-DRB1/HLA-DQB1	2
DOID:13922	eosinophilic esophagitis	2/139	14/10312	0.0147635	0.0630588	0.0438936	ANG/IL15	2
DOID:5425	ovarian hyperstimulation syndrome	2/139	14/10312	0.0147635	0.0630588	0.0438936	CXCL8/LEP	2
DOID:9849	Meniere's disease	2/139	14/10312	0.0147635	0.0630588	0.0438936	PTPN22/HLA-DRB1	2
DOID:9847	peripheral vertigo	2/139	15/10312	0.0168858	0.0688288	0.0479099	PTPN22/HLA-DRB1	2
DOID:9848	endolymphatic hydrops	2/139	15/10312	0.0168858	0.0688288	0.0479099	PTPN22/HLA-DRB1	2
