# Supplementary material for: Integrated transcriptomic analysis and machine learning for characterizing diagnostic biomarkers and immune cell infiltration in fetal growth restriction
Source: Front Immunol. 2024 Sep 4;15:1381795. doi: 10.3389/fimmu.2024.1381795 (PMC11408188; doi:10.3389/fimmu.2024.1381795)
Supplement: Supplementary Table 5 — The OR value and 95% CI of 4 hub genes for FGR diagnosis. OR, odds ratio; CI, confidence interval. [file Table5.xlsx]

## Sheet: Sheet1
Gene	SCD	SPINK1	TREM1	HIST1H2BB
FGR	8.6±0.7	3.3±2.0	8.3±1.4	7.3±0.8
Control	7.3±0.8	0.9±1.1	6.6±1.4	6.0±2.0
OR(95%CI)	11.17(2.69±46.34)	2.52(1.45±4.40)	2.42(1.42±4.13)	2.30(1.25-4.25)
p-value	p<0.001	p=0.001	p=0.001	p=0.008
