# Supplementary material for: Integrated transcriptomic analysis and machine learning for characterizing diagnostic biomarkers and immune cell infiltration in fetal growth restriction
Source: Front Immunol. 2024 Sep 4;15:1381795. doi: 10.3389/fimmu.2024.1381795 (PMC11408188; doi:10.3389/fimmu.2024.1381795)
Supplement: Supplementary Table 6 — Primers of PCR. [file Table6.xlsx]

## Sheet: Sheet1
Gene	Primer sequence	Size
ACTB	Forward: 5’- CCATTGGCAATGAGCGGTTCC -3’	124bp
	Reverse: 5’- CGGATGTCCACGTCACACTTCA -3’
TREM1	Forward: 5’- CTTGGCAGATAATAAGGGACGG -3’	136bp
	Reverse: 5’- CGGACGCGCAGTAAACCAT -3’
